# Supplementary material for: Ultrafine PdAu nanoparticles immobilized on amine functionalized carbon black toward fast dehydrogenation of formic acid at room temperature
Source: Royal Society of Chemistry journal article supplement (doi:10.1039/c9na00462a), 2019-01-01
Supplement: c9na00462a1.pdf [file c9na00462a1.pdf]

*Supporting Information*

**Ultrafine PdAu Nanoparticles Immobilized on Amine Functionalized Carbon Black toward  
Fast Dehydrogenation of Formic Acid at Room Temperature**

Luming Wu,<sup>a</sup> Baoxia Ni,<sup>a</sup> Rui Chen,<sup>a</sup> Chengxiang Shi,<sup>a</sup> Pingchuan Sun,<sup>b,c</sup> Tiehong Chen<sup>\*a,c</sup>

<sup>a</sup> Institute of New Catalytic Materials Science, School of Materials Science and Engineering, Key Laboratory of Advanced Energy Materials Chemistry (MOE), Nankai University, Tianjin 300350, PR China

<sup>b</sup> Key Laboratory of Functional Polymer Materials of Ministry of Education, College of Chemistry, Nankai University, Tianjin 300071, PR China

<sup>c</sup> Collaborative Innovation Center of Chemical Science and Engineering (Tianjin), Tianjin 300071, PR China

\* E-mail: [chenth@nankai.edu.cn](mailto:chenth@nankai.edu.cn).

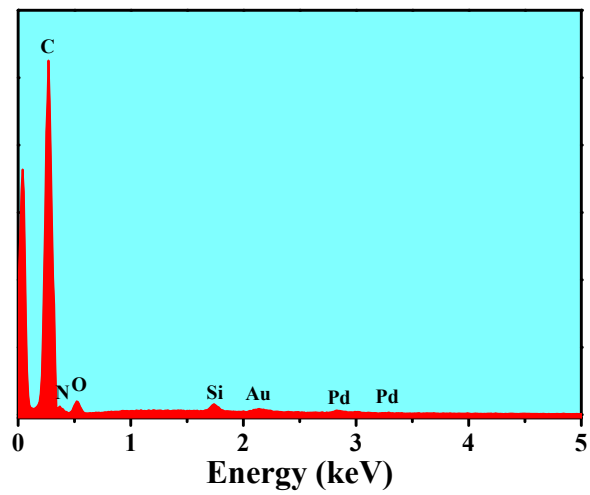

**Figure S1.** EDX pattern of the Pd<sub>0.6</sub> Au<sub>0.4</sub>/VXC-72-NH<sub>2</sub>.

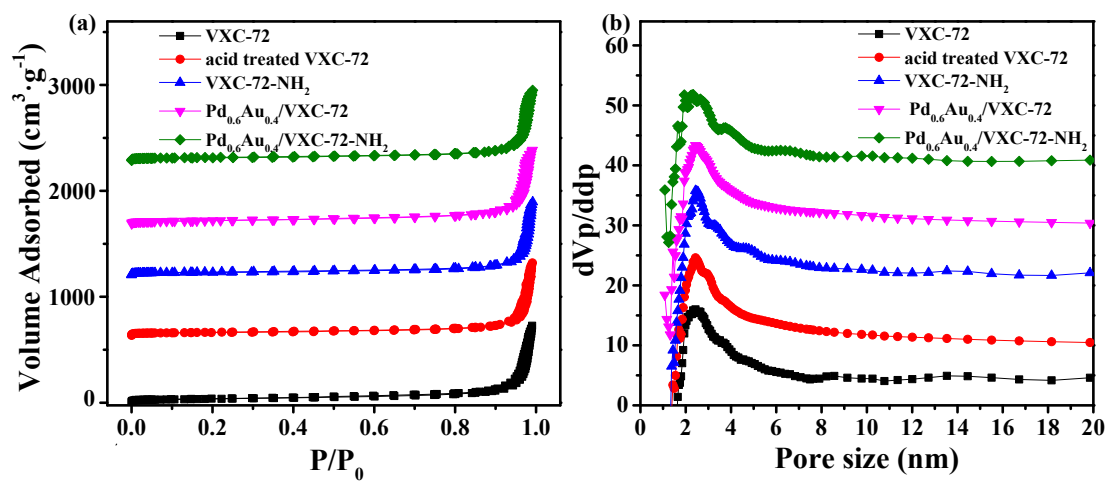

**Figure S2.** (a) N<sub>2</sub> adsorption-desorption isotherms and (b) the corresponding PSD curves.

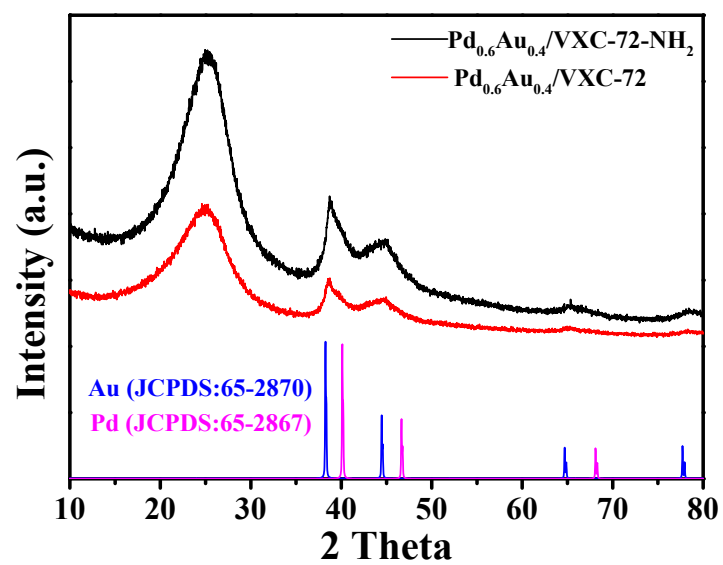

**Figure S3.** XRD patterns of Pd<sub>0.6</sub>Au<sub>0.4</sub>/VXC-72-NH<sub>2</sub> and Pd<sub>0.6</sub>Au<sub>0.4</sub>/VXC-72 after heat treatment at 773 K for 3 h in Ar atmosphere.

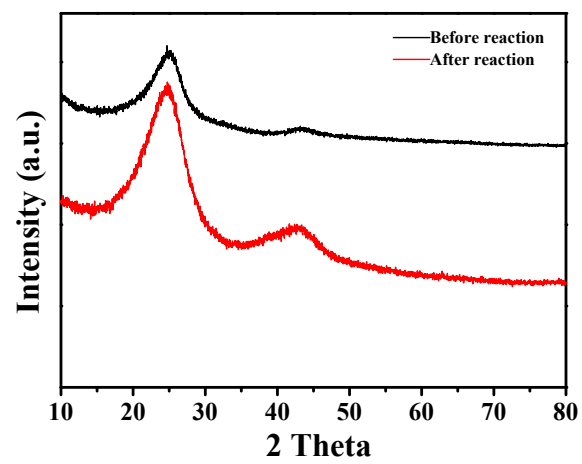

**Figure S4.** XRD patterns of the Pd<sub>0.6</sub>Au<sub>0.4</sub>/VXC-72-NH<sub>2</sub> (a) before and (b) after catalysis.

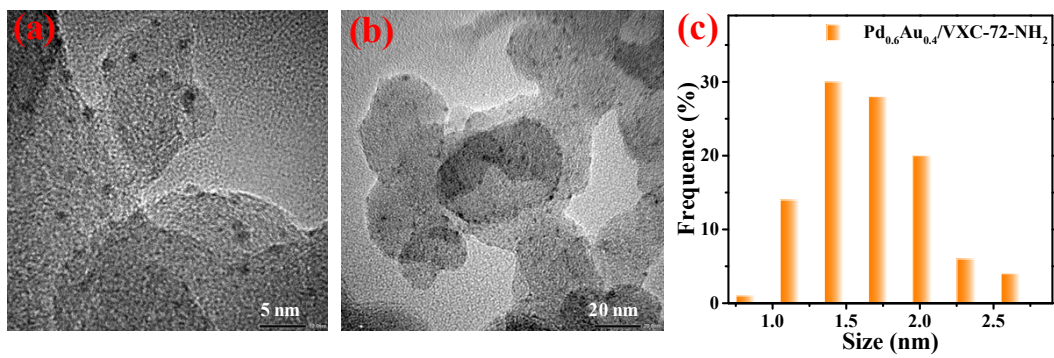

**Figure S5.** TEM images and size distribution of  $\text{Pd}_{0.6}\text{Au}_{0.4}/\text{VXC-72-NH}_2$  after the 5<sup>th</sup> run.

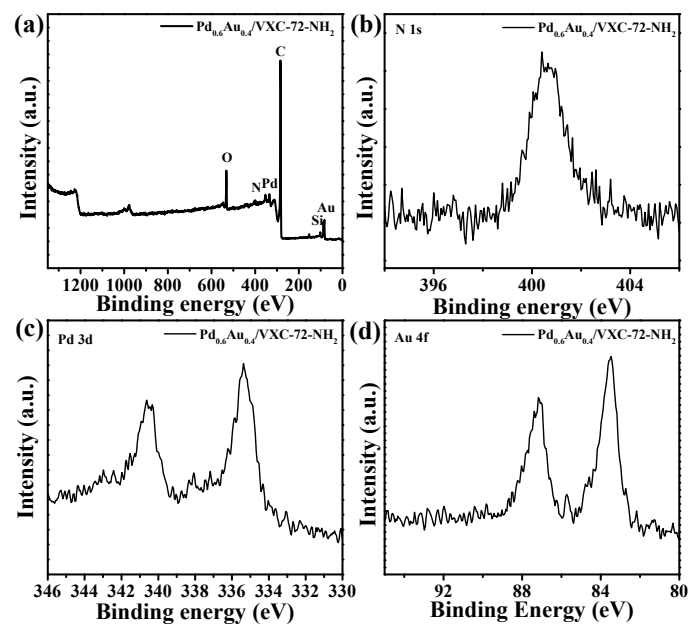

**Figure S6.** XPS spectra of  $\text{Pd}_{0.6}\text{Au}_{0.4}/\text{VXC-72-NH}_2$  after after the 5<sup>th</sup> run.

**Table S1.** The BET surface area and pore volume of various samples measured from N<sub>2</sub> adsorption desorption isotherms.

| Sample                                                      | S <sub>BET</sub> (m <sup>2</sup> ·g <sup>-1</sup> ) | Pore volume (cm <sup>3</sup> ·g <sup>-1</sup> ) | Average pore size (nm) <sup>a</sup> |
|-------------------------------------------------------------|-----------------------------------------------------|-------------------------------------------------|-------------------------------------|
| VXC-72                                                      | 120                                                 | 0.68                                            | 2.43                                |
| Acid treated VXC-72                                         | 119                                                 | 0.65                                            | 2.43                                |
| VXC-72-NH <sub>2</sub>                                      | 103                                                 | 0.57                                            | 2.33                                |
| Pd <sub>0.6</sub> Au <sub>0.4</sub> /VXC-72                 | 105                                                 | 0.42                                            | 2.43                                |
| Pd <sub>0.6</sub> Au <sub>0.4</sub> /VXC-72-NH <sub>2</sub> | 108                                                 | 0.35                                            | 2.33                                |



**Table S2.** The C, O, N and Si atomic percentage in the samples as determined by XPS

| Catalyst                                                                  | C (at%) | O (at%) | N (at%) | Si (at%) | Au (at%) | Pd (at%) |
|---------------------------------------------------------------------------|---------|---------|---------|----------|----------|----------|
| VXC-72                                                                    | 99.08   | 0.92    | --      | --       | --       | --       |
| Acid treated VXC-72                                                       | 93.37   | 6.63    | --      | --       | --       | --       |
| VXC-72-NH <sub>2</sub>                                                    | 85.32   | 10.70   | 1.98    | 2.00     | --       | --       |
| Pd <sub>0.6</sub> Au <sub>0.4</sub> /VXC-72-NH <sub>2</sub>               | 87.30   | 7.46    | 2.18    | 2.21     | 0.28     | 0.57     |
| Pd <sub>0.6</sub> Au <sub>0.4</sub> /VXC-72-NH <sub>2</sub><br>(recycled) | 90.01   | 7.31    | 1.83    | 1.86     | 0.26     | 0.54     |

**Table S3.** The contents of Au and Pd in the samples determined by inductively coupled plasma-atomic emission spectrometry (ICP-AES).

| Catalyst                                                               | Pd (wt%) | Au (wt%) |
|------------------------------------------------------------------------|----------|----------|
| Pd/VXC-72-NH <sub>2</sub>                                              | 1.75     | --       |
| Pd <sub>0.8</sub> Au <sub>0.2</sub> /VXC-72-NH <sub>2</sub>            | 1.41     | 0.62     |
| Pd <sub>0.6</sub> Au <sub>0.4</sub> /VXC-72-NH <sub>2</sub>            | 1.06     | 1.31     |
| Pd <sub>0.4</sub> Au <sub>0.6</sub> /VXC-72-NH <sub>2</sub>            | 0.71     | 1.92     |
| Pd <sub>0.2</sub> Au <sub>0.8</sub> /VXC-72-NH <sub>2</sub>            | 0.36     | 2.62     |
| Au/VXC-72-NH <sub>2</sub>                                              | --       | 3.26     |
| Pd <sub>0.6</sub> Au <sub>0.4</sub> /VXC-72                            | 1.04     | 1.31     |
| Pd <sub>0.6</sub> Au <sub>0.4</sub> /VXC-72-NH <sub>2</sub> (recycled) | 1.03     | 1.29     |
